# Supplementary material for: The Association between Vitamin D and Anti-Müllerian Hormone: A Systematic Review and Meta-Analysis
Source: Nutrients. 2020 May 28;12(6):1567. doi: 10.3390/nu12061567 (PMC7352921; doi:10.3390/nu12061567)
Supplement: Supplementary file 1 [file nutrients-12-01567-s001.pdf]

Supplementary Table S1. Newcastle-Ottawa Scale for assessing quality of interventional cohort studies.

| Author          | Year | Selection of study groups                    |                                       |                        |                                                            | Compara-<br>bility               | Outcome               |                                                   |                                        | Total<br>quality<br>scores |
|-----------------|------|----------------------------------------------|---------------------------------------|------------------------|------------------------------------------------------------|----------------------------------|-----------------------|---------------------------------------------------|----------------------------------------|----------------------------|
|                 |      | Represent-<br>ativeness of<br>exposed cohort | Selection of<br>non-exposed<br>cohort | Exposure<br>assessment | Outcome of<br>interest not<br>present at start of<br>study | Compara-<br>bility of<br>cohorts | Outcome<br>assessment | Adequacy of<br>length of time<br>before follow-up | Adequacy of<br>follow-up of<br>cohorts |                            |
| Irani, M        | 2014 | ★                                            | ★                                     | ★                      | ★                                                          | ★★                               | ★                     | ★                                                 | ★                                      | 9                          |
| Cappy, H        | 2016 | ★                                            | ★                                     |                        | ★                                                          | ★★                               | ★                     | ★                                                 | ★                                      | 8                          |
| Dennis,<br>NA   | 2017 | ★                                            | ★                                     | ★                      | ★                                                          | ★★                               | ★                     |                                                   | ★                                      | 8                          |
| Naderi, Z       | 2018 | ★                                            | ★                                     | ★                      | ★                                                          | ★★                               | ★                     | ★                                                 | ★                                      | 9                          |
| Dastorani,<br>M | 2018 | ★                                            | ★                                     | ★                      | ★                                                          | ★★                               | ★                     | ★                                                 | ★                                      | 9                          |

<sup>a</sup> A study can be awarded a maximum of one star for each numbered item except for the item, “Comparability of cohorts”. <sup>b</sup> A maximum of two stars can be awarded for “Comparability of cohorts”.
